# Supplementary material for: The dual effects of root-cap exudates on nematodes: from quiescence in plant-parasitic nematodes to frenzy in entomopathogenic nematodes
Source: PubMed Central journal article supplement (PMC4286403; doi:10.1093/jxb/eru345), 2014-08-27
Supplement: supp_eru345_jexbot129270_file001.pdf [file supp_eru345_jexbot129270_file001.pdf]

## The dual effects of root cap exudates on nematodes: from quiescence in plant parasitic nematodes to frenzy in entomopathogenic nematode

Ivan Hiltbold<sup>1</sup>, Geoffrey Jaffuel<sup>2</sup>, Ted C.J. Turlings<sup>2</sup>

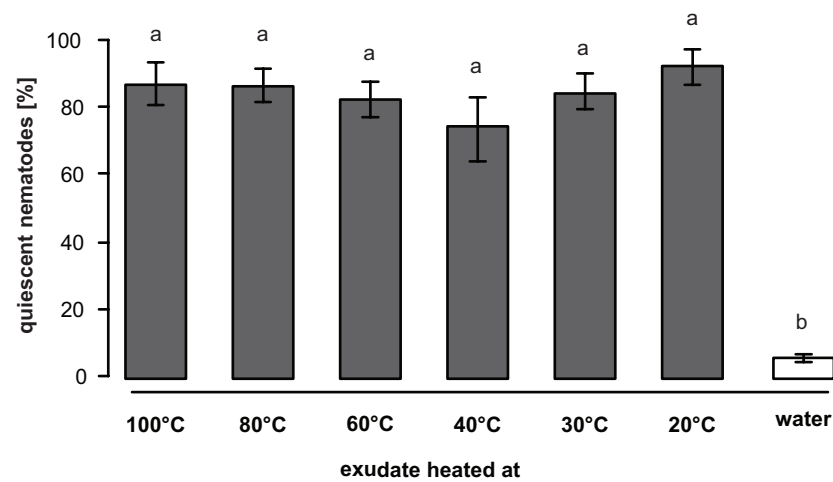

### Supplementary figure S1

Heating the green pea exudate did not impair the induction quiescence in *Heterorhabditis bacteriophora* (grey bars), whereas inactive nematode percentage in water (white bar) remained very low. Letters indicate statistical differences. Bars represent SEM.

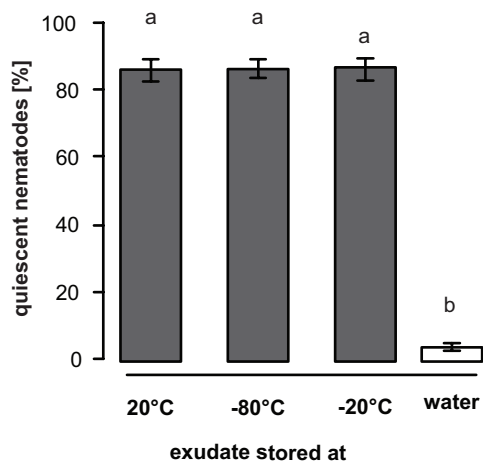

### Supplementary figure S1

Freezing the green pea exudate did not impair the induction quiescence in *Heterorhabditis bacteriophora* (grey bars), whereas inactive nematode percentage in water (white bar) remained very low. Letters indicate statistical differences. Bars represent SEM.
